# Supplementary material
Source: PubMed Central journal article supplement (PMC6606871)
Supplement: AEM.00961-19-s0001.pdf [file AEM.00961-19-s0001.pdf]

## Supplemental Information

### *Effects of transfecting Carrier RNA into BGMK cells*

Carrier RNA (cRNA, small pieces of RNA with random sequences) is used during the extraction of RNA to increase recovery efficiency. It was suspected during testing of the transfection method that transfection of carrier RNA into BGMK cells could potentially lead to CPE. To verify this, blank samples consisting of only PBS without viral RNA were subjected to the same RNA extraction process as regular samples (including the manufacturer recommended amount of cRNA). The concentration of cRNA was estimated to be approx. 69.3 ng/ $\mu$ L in the final extracted sample based on the manufacturer recommended addition of 5.54  $\mu$ g of cRNA for each sample mix during extraction and the final elution of 80  $\mu$ L from the RNA extraction column. These blank samples were then serially diluted (1:2), and the blanks with their dilutions were transfected onto BGMK cells as described above. Cells were checked for CPE over 5-10 days in order to determine if CPE occurred in the presence of cRNA alone without viral RNA, and if so, to determine the cutoff concentration of cRNA below which CPE would not occur.

**Table S1:** Transfection of carrier RNA onto BGMK cells. The number of wells positive for cytopathic effect (CPE) per the total number of transfected wells is shown for different estimated concentrations of carrier RNA.

| RNA Extract per well ( $\mu$ L) | Estimated Amount of cRNA ( $\mu$ g) | CPE Positive Wells/ Total Wells |
|---------------------------------|-------------------------------------|---------------------------------|
| 2                               | 1.39E-01                            | 10/10                           |
| 1                               | 6.93E-02                            | 10/10                           |
| 0.5                             | 3.47E-02                            | 0/5                             |
| 0.25                            | 1.73E-02                            | 0/5                             |
| 0.125                           | 8.66E-03                            | 0/5                             |
| 0.0625                          | 4.33E-03                            | 0/5                             |

20 *CPE caused by cRNA transfection*

21 Transfection of blank samples containing no viral RNA but containing cRNA used during the RNA  
22 extraction process was found to result in significant CPE in BGMKs (Table S1). Amounts of cRNA >  
23 34.7 ng per well were able to produce CPE in 10/10 (100%) of wells transfected. When media from these  
24 transfected wells was inoculated onto fresh BGMK cells, CPE was not observed, indicating that CPE was  
25 not due to the presence of contaminating infectious agents. At amounts of cRNA  $\leq$  34.7 ng, no CPE was  
26 observed in any of the 10 wells (0%), indicating a cutoff of transfection induced cRNA associated CPE in  
27 BGMKs somewhere between 34.7 and 69.3 ng per well. Due to the results of this experiment, MPN  
28 positives from the transfection assay were not used for the purpose of calculating MPN values when  
29 estimated cRNA content was >34.7 ng per well.

30 *Detection of Transfectable RNA with and without cRNA*

31 The addition of cRNA is usually only indicated for in samples that have low concentrations of RNA, in  
32 which case it can improve chances of detection. Given our observations of CPE caused by cRNA, we  
33 performed a simple test to observe the effect of extracting RNA from serially diluted virus samples with a  
34 and without cRNA to determine the effect on the transfection assay detection limit (Table S2). In samples  
35 with the lowest concentration of IV/ml, transfectable RNA was not detected in samples extracted without  
36 cRNA (Table S2). Extraction with cRNA thus allowed us to detect lower concentrations of transfectable  
37 RNA. This lower detection limit was partly offset by the occurrence of CPE due to cRNA. However, as  
38 long as we confirmed the presence of replicable E11 in these wells by culturing or PCR to exclude false-  
39 positives (see section 2.1), the wells affected by cRNA could nevertheless be included to determine the  
40 TGU/mL. Overall, including cRNA in the extraction procedure would allow us to maintain a larger  
41 window of observable transfection reductions and we decided against removing cRNA from the  
42 extraction step.

43

44 **Table S2.** Observed concentrations of transfected samples of RNA extracted from serially diluted E11  
 45 virus samples with and without cRNA.

| IV / mL (log <sub>10</sub> ) | TGU / mL (log <sub>10</sub> ), RNA extracted without cRNA | TGU / mL (log <sub>10</sub> ), RNA extracted with cRNA |
|------------------------------|-----------------------------------------------------------|--------------------------------------------------------|
| 5.7                          | Not detected                                              | 2.8                                                    |
| 6.7                          | 3.8                                                       | 4.2                                                    |
| 8.5                          | 5.0                                                       | 4.7                                                    |

46

47 *Loss of intact virus and viral RNA is minimal during Amicon concentration step*

48 To test the loss of virus due to the centrifugal (Amicon) concentration step in our procedure, we compared  
 49 the total number of genome copies (GC) in duplicate samples taken from our heat inactivation experiment  
 50 before and after subjecting them to centrifugal concentration. We detected only slight reductions in GC  
 51 (0.33-log<sub>10</sub>) in control samples (prior to heating).. Similarly, minimal reductions in detected GC (0.06-  
 52 log<sub>10</sub>) were observed for samples treated with heat (55°C) for 50 sec. From these results we concluded  
 53 that loss of intact virus and naked viral genome due to the concentration step was minimal in our  
 54 experiments and thus did not play a significant role in low transfection efficiencies.

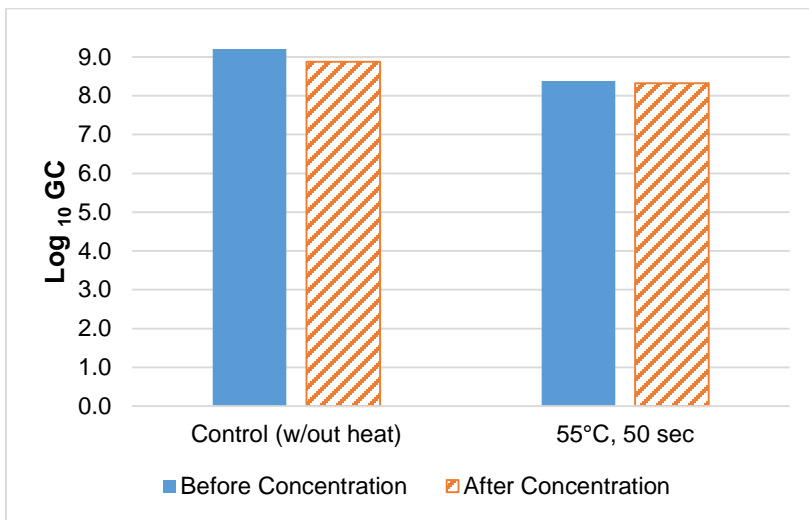

55

56 **Figure S1:** Effects of concentration step on detection of viral RNA from intact untreated virus (control)  
 57 and viruses treated with heat (55°C) for 50 sec. The bars represent total GC (back calculated to the  
 58 amount present in the original sample) detected in the sample before concentration (Blue bars) and after  
 59 concentration (orange dashed bars).
